# Supplementary material
Source: publisher figshare collection journal article supplement (https://sage.figshare.com/ndownloader/files/22826861)
Supplement: Supplementary file 1 [file 22826861]

- S5 S1 AND S2 AND S3 AND S4
- S4 peripheral arterial disease OR peripheral vascular disease OR arterial occlusive disease OR arteriosclerosis OR intermittent claudication OR claudication pain OR claudication
- S3 exercise OR exercise training OR walking or walking training OR walking exercise OR supervised exercise OR unsupervised exercise OR homebased exercise OR physical activity OR training
- S2 experience OR routine practice OR routine care OR attitude OR practice or access OR enabler OR factor OR perception OR opinion OR barrier OR facilitator
- S1 general practitioner OR vascular specialist OR vascular surgery OR vascular surgeon OR physiotherapist OR physiotherapy OR physical therapy OR nurse, patient OR vascular unit OR Hospital OR Clinic OR Vascular clinic OR vascular registrar

**Where:** Title/abstract

Date limit: Inception to February 2018

Exclusions: commentary or editorial or letter as publication type

Language: abstract available in English

**Appendix 1:** Search strategy for exercise therapy in routine care for peripheral arterial disease and intermittent claudication implemented in AMED via EBSCOhost
